# Supplementary material for: Influence of Plant Physical and Anatomical Characteristics on the Ovipositional Preference of Orius sauteri (Hemiptera: Anthocoridae)
Source: MDPI journal article supplement (doi:10.3390/insects12040326), 2021-04-06
Supplement: s1 [file s1]

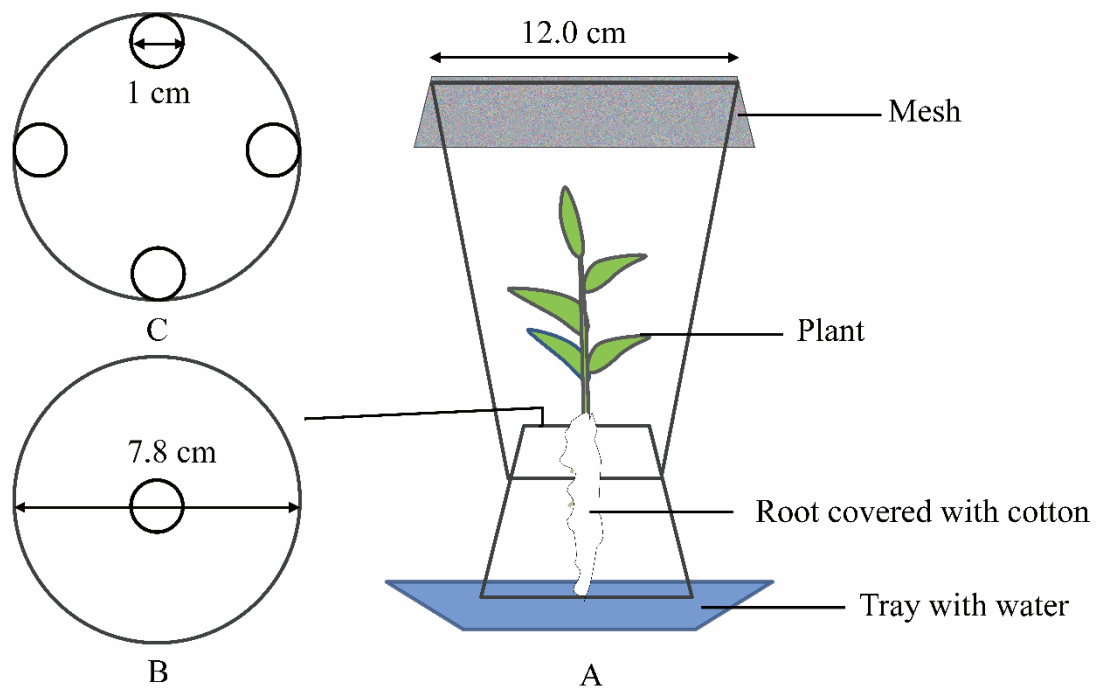

**Figure. S1.** The container for *Orius sauteri* in the oviposition preferences assay.
